# Supplementary material for: Sulfur vacancies in Co9S8−x/N-doped graphene enhancing the electrochemical kinetics for high-performance lithium–sulfur batteries
Source: Royal Society of Chemistry journal article supplement (doi:10.1039/d1ta00800e), 2021-01-01
Supplement: d1ta00800e1.pdf [file d1ta00800e1.pdf]

Electronic Supplementary Material (ESI) for Journal of Materials Chemistry A  
This journal is © The Royal Society of Chemistry 2014

## Supplementary Materials for

### Sulfur vacancies in $\text{Co}_9\text{S}_8$ -x/N-doped graphene enhancing the electrochemical kinetics for high-performance lithium-sulfur batteries

Hao-Jie Li<sup>a</sup>, Yi-Hua Song<sup>a</sup>, Kai Xi<sup>b</sup>, Wei Wang<sup>a</sup>, Sheng Liu<sup>a</sup>, Guo-Ran Li<sup>a\*</sup> and Xue-Ping Gao<sup>a</sup>

<sup>a</sup> Institute of New Energy Material Chemistry, School of Materials Science and Engineering, Renewable Energy Conversion and Storage Center, Nankai University, Tianjin 300350, China.

<sup>b</sup> Department of Engineering, University of Cambridge, Cambridge CB3 0FA, United Kingdom

\*Email: [guoranli@nankai.edu.cn](mailto:guoranli@nankai.edu.cn)

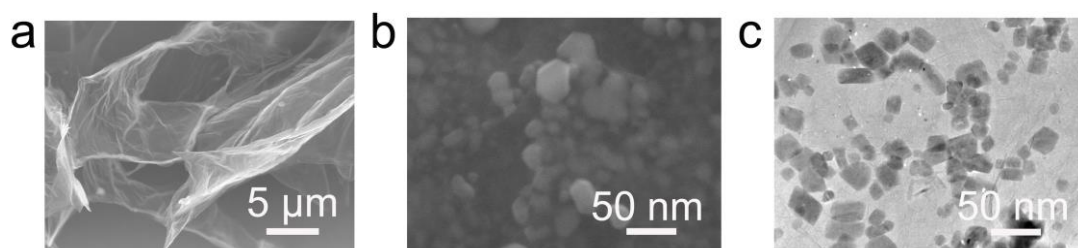

**Figure. S1** SEM image of a) N-doped graphene and b)  $\text{Co}_9\text{S}_8$  /N-doped graphene; c) TEM image of  $\text{Co}_9\text{S}_8$ -x/N-doped graphene.

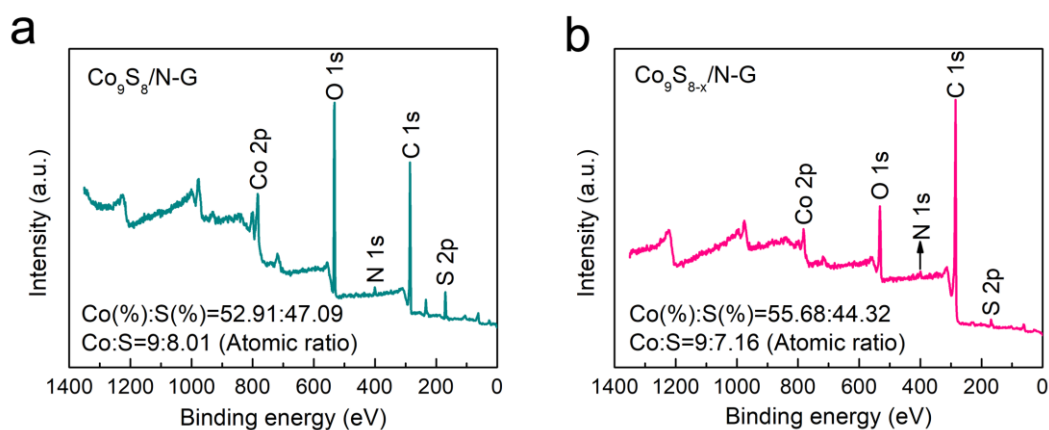

**Figure. S2** XPS survey spectra of a)  $\text{Co}_9\text{S}_8$ /N-doped graphene and b)  $\text{Co}_9\text{S}_8$ -x/N-doped graphene.

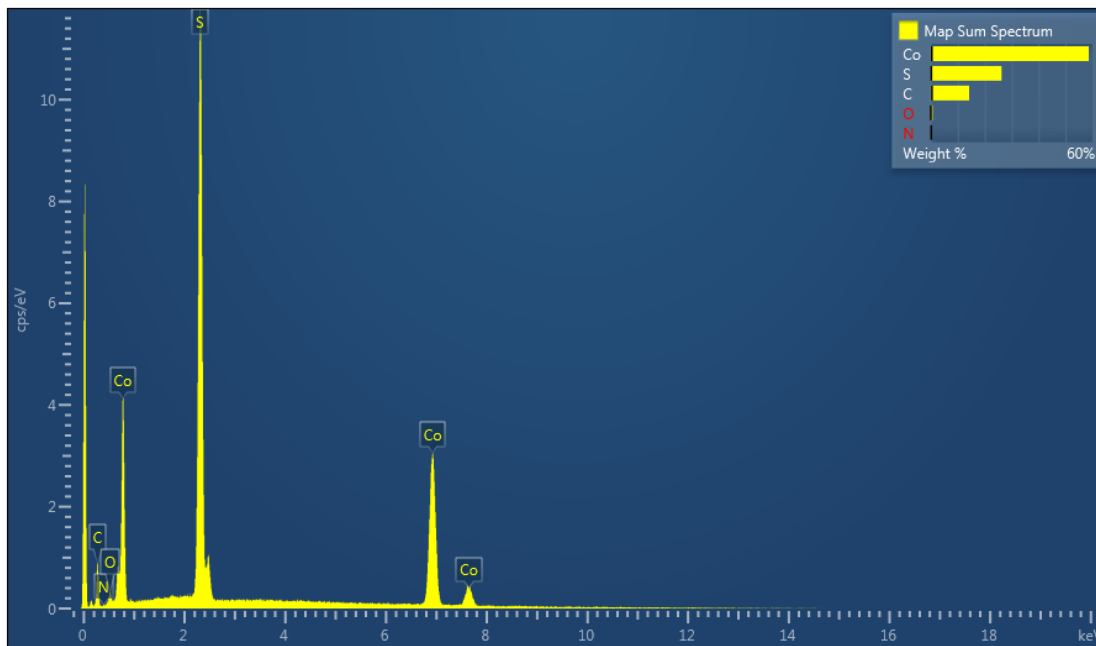

**Figure S3** EDS of  $\text{Co}_9\text{S}_8/\text{N-G}$

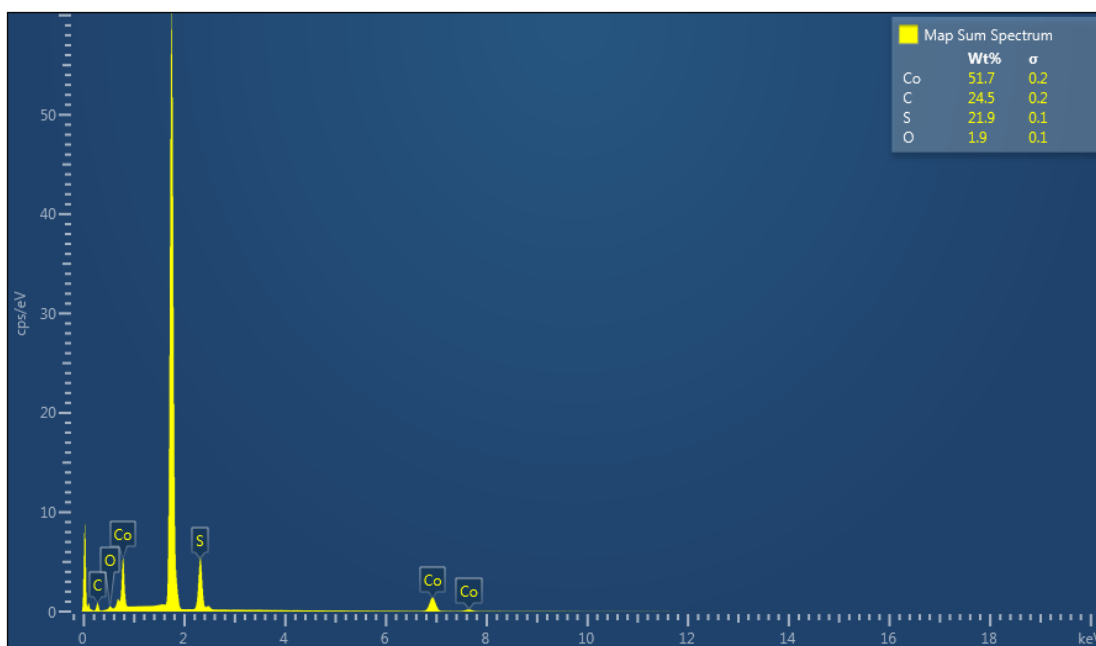

**Figure S4** EDS of  $\text{Co}_9\text{S}_{8-x}/\text{N-G}$

**Table S1** Amount of element of  $\text{Co}_9\text{S}_8/\text{N-G}$  and  $\text{Co}_9\text{S}_{8-x}/\text{N-G}$  based on EDS

| Sample                                 | EDS         |            |            |            | Content             |                                          |
|----------------------------------------|-------------|------------|------------|------------|---------------------|------------------------------------------|
|                                        | Co<br>(wt%) | S<br>(wt%) | C<br>(wt%) | O<br>(wt%) | Mol Ratio<br>(Co:S) | cobalt sulfide<br>Content<br>/(Co+S+C+O) |
| $\text{Co}_9\text{S}_8/\text{N-G}$     | 55.1        | 24.2       | 15.6       | 3.6        | 1.15 (9:7.8)        | 80                                       |
| $\text{Co}_9\text{S}_{8-x}/\text{N-G}$ | 51.7        | 21.9       | 24.5       | 1.9        | 1.28 (9:7.02)       | 74                                       |

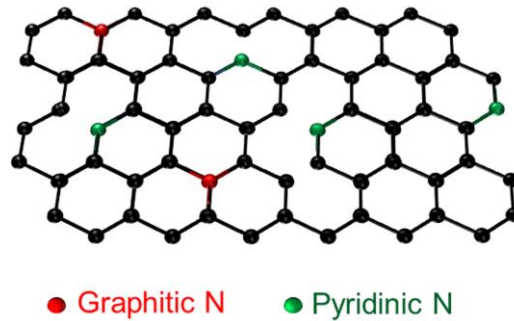

**Figure. S5** Schematic structure of N-doped graphene.

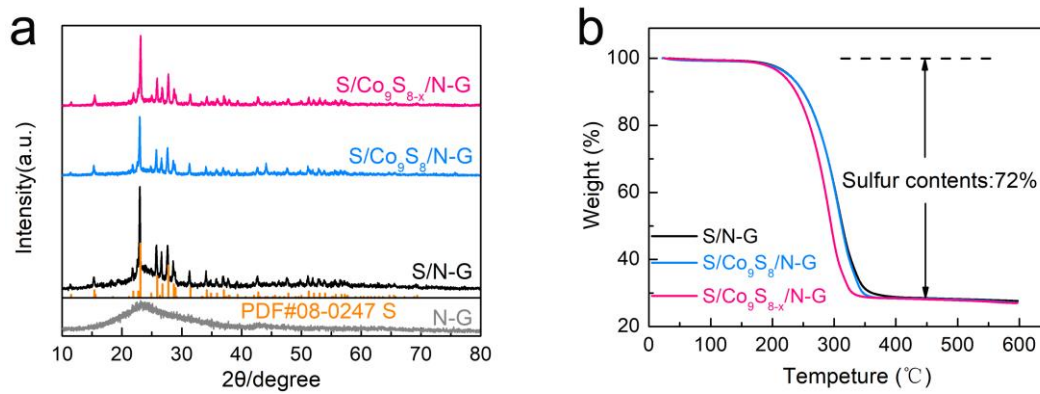

**Figure. S6** a) XRD pattern and b) TGA curve of  $\text{S}/\text{Co}_9\text{S}_{8-x}/\text{N}$ -doped graphene,  $\text{S}/\text{Co}_9\text{S}_8/\text{N}$ -doped graphene,  $\text{S}/\text{N}$ -doped graphene, as well as  $\text{N}$ -doped graphene for comparison.

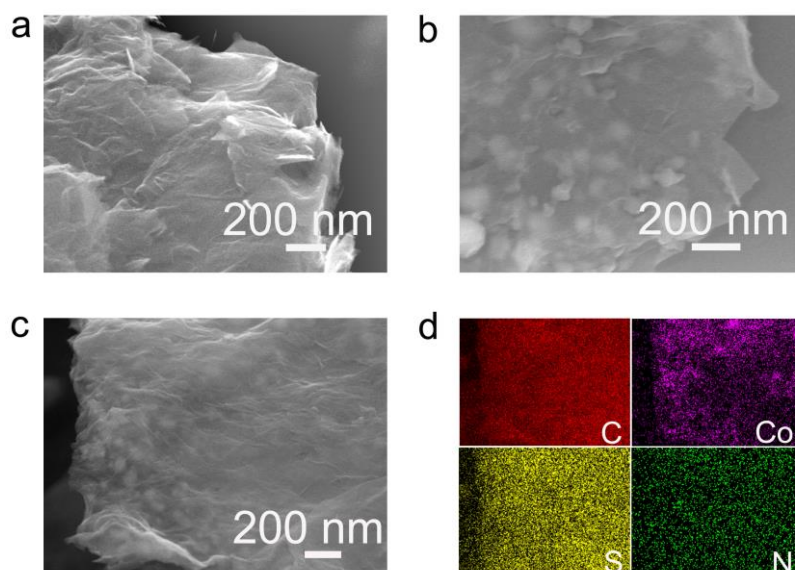

**Figure. S7** SEM image of S /N-doped graphene (a), S/Co<sub>9</sub>S<sub>8</sub>/N-doped graphene (b), and S/Co<sub>9</sub>S<sub>8-x</sub>/N-doped graphene (c); the corresponding EDS element maps of S/Co<sub>9</sub>S<sub>8-x</sub>/N-doped graphene.

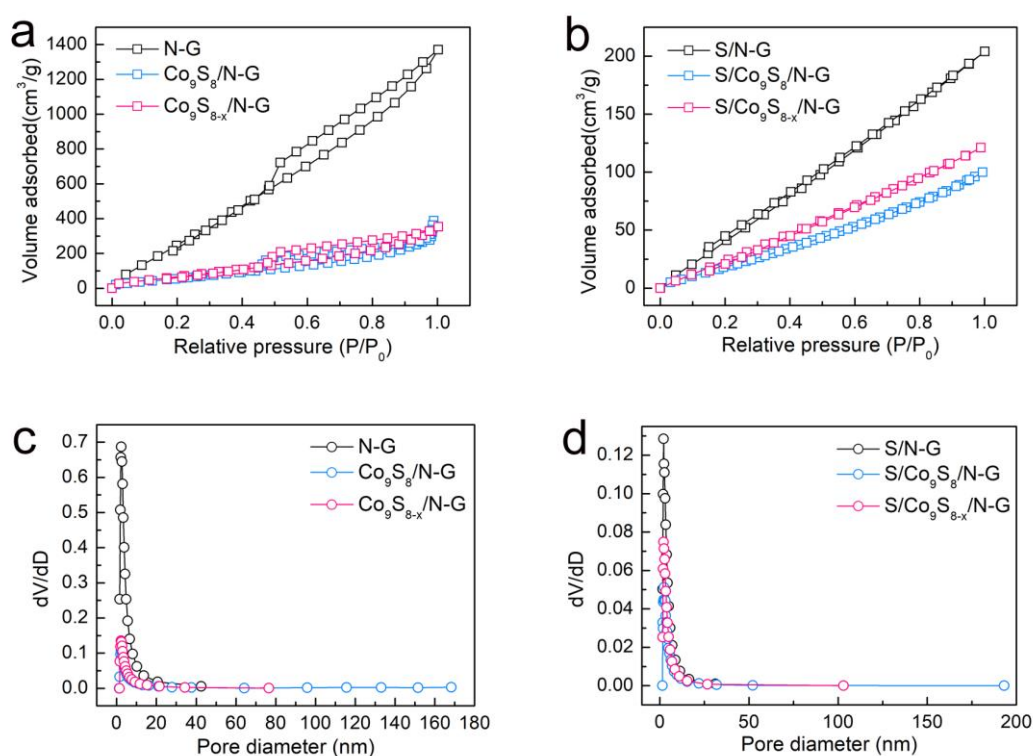

**Figure. S8.** N<sub>2</sub> adsorption-desorption isotherm and pore size distribution plot of the host materials and after loading sulfur.

**Table S2** Specific surface area and pore size data of the host materials and after loading sulfur

| Materials                                              | Co <sub>9</sub> S <sub>8-x</sub> | S/Co <sub>9</sub> S <sub>8-x</sub> | Co <sub>9</sub> S <sub>8</sub> | S/Co <sub>9</sub> S <sub>8</sub> | N-G  | S/N-G |
|--------------------------------------------------------|----------------------------------|------------------------------------|--------------------------------|----------------------------------|------|-------|
|                                                        | /N-G                             | /N-G                               | /N-G                           | /N-G                             |      |       |
| Specific surface areas /m <sup>2</sup> g <sup>-1</sup> | 327                              | 191                                | 273                            | 118                              | 1664 | 313   |
| Average pore size/nm                                   | 6.7                              | 4.0                                | 6.6                            | 4.0                              | 5.8  | 4.1   |
| Total pore volume/cm <sup>3</sup> g <sup>-1</sup>      | 0.61                             | 0.19                               | 0.60                           | 0.16                             | 4.73 | 0.32  |

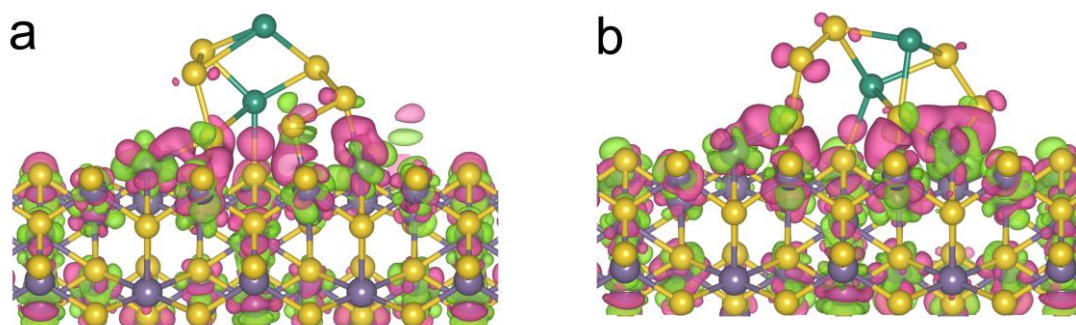

**Figure. S9** Visualized vacancy charge difference between the a) Co<sub>9</sub>S<sub>8</sub> (311)-Li<sub>2</sub>S<sub>6</sub> and b) Co<sub>9</sub>S<sub>8-x</sub> (311)-Li<sub>2</sub>S<sub>6</sub> surfaces. Pink isosurface and green isosurface represent the positive and the negative charges migration, and the small pink ball marked was the vacancy. Obviously, a great lack of charges around the vacancy also affected the charge distribution of the nearby Co atoms.

**Table S3** Selected bond lengths (Å) of the  $\text{Li}_2\text{S}_6@\text{Co}_9\text{S}_8$  (311) and  $\text{Li}_2\text{S}_6@\text{Co}_9\text{S}_{8-x}$  (311) complexes

| Bond length<br>(Å)                | Co-S, surf<br>(Avg) | Co-S, int | Li-S | S-S    |
|-----------------------------------|---------------------|-----------|------|--------|
| $\text{Co}_9\text{S}_8$ (311)     | 2.23~2.50<br>(2.30) | 2.20      | 2.37 | 2.5185 |
| $\text{Co}_9\text{S}_{8-x}$ (311) | 2.13~2.33<br>(2.23) | 2.07      | 2.68 | 2.5200 |

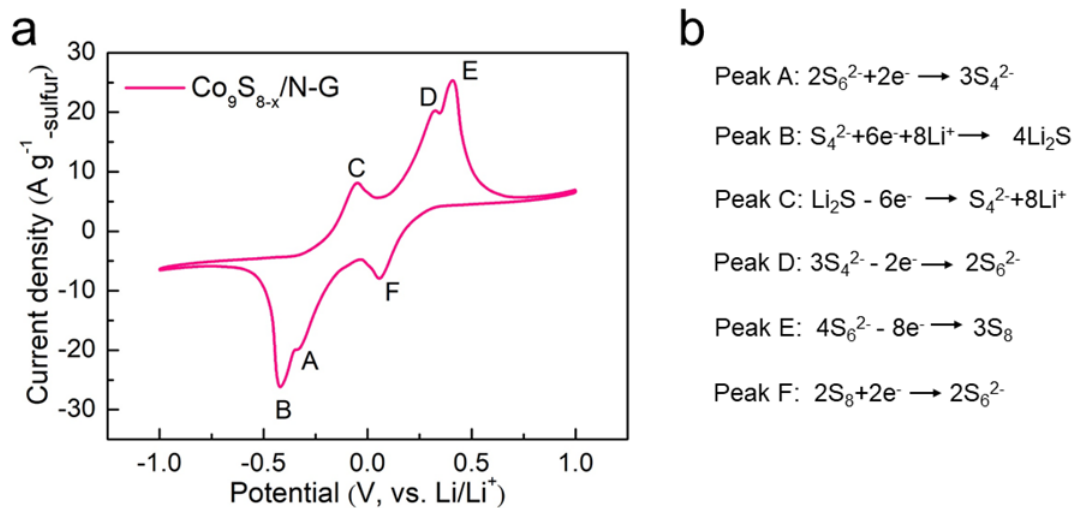

**Figure. S10** a) The cyclic voltammograms of the symmetric cell with  $\text{Co}_9\text{S}_{8-x}/\text{N-G}$  catalyst; b) The electrode reaction for the redox peaks.

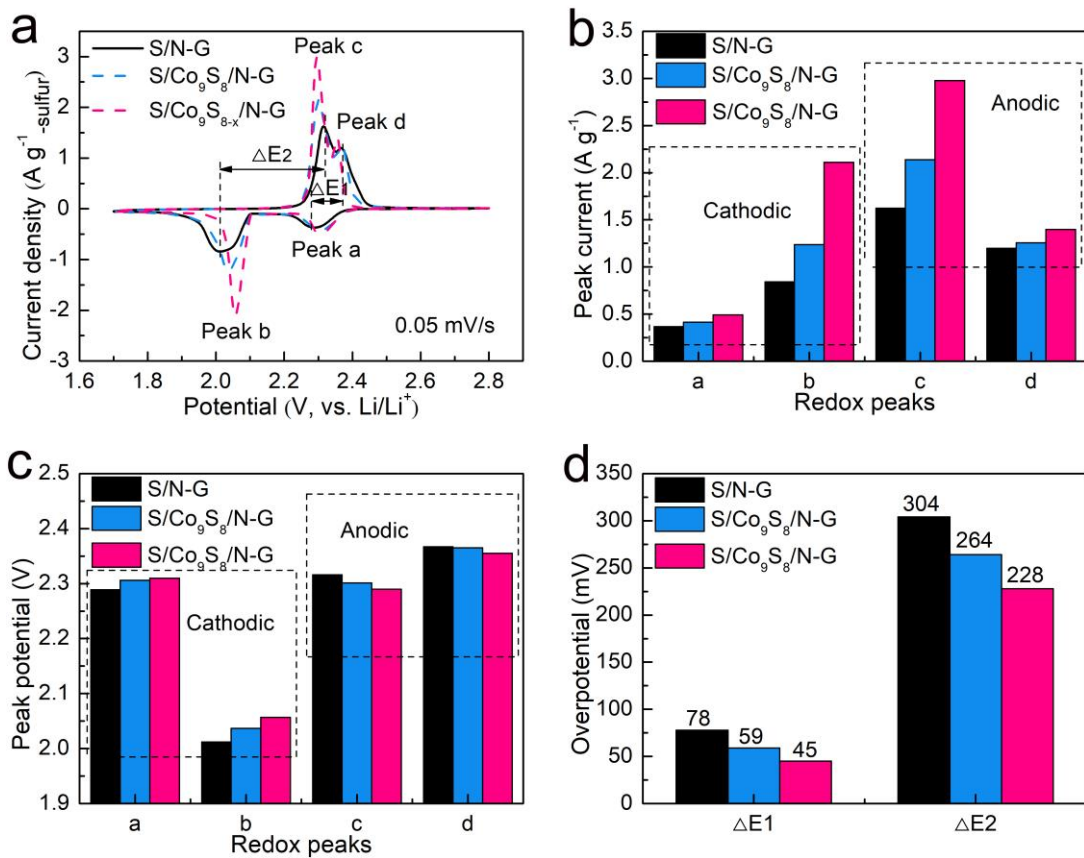

**Figure. S11** a) CV profile of S/Co<sub>9</sub>S<sub>8-x</sub>/N-doped graphene, S/Co<sub>9</sub>S<sub>8</sub>/N-doped graphene, and S/N-doped graphene at a scanning rate of 0.05 mVs<sup>-1</sup>; comparison of peak current (b), peak potential (c), and potential difference (d).

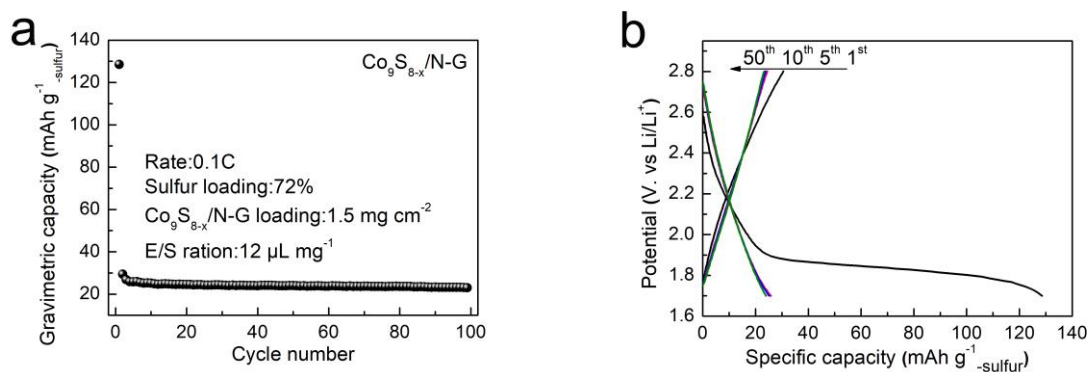

**Figure. S12** Cycle performance (a) and charge-discharge curves (b) of Co<sub>9</sub>S<sub>8-x</sub>/N-doped graphene.

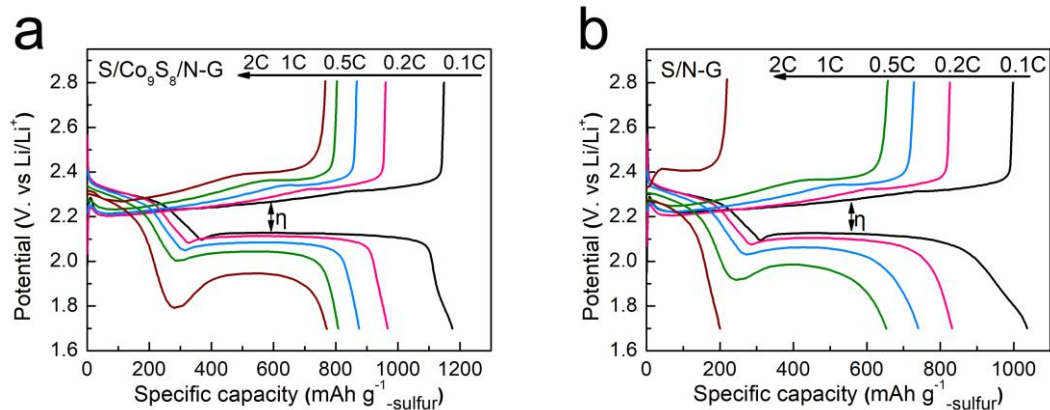

**Figure. S13** Charge-discharge curves at various rates of a) S/Co<sub>9</sub>S<sub>8</sub>/N-doped graphene, and c) S/N-doped graphene; and comparison of the corresponding overpotential (d).

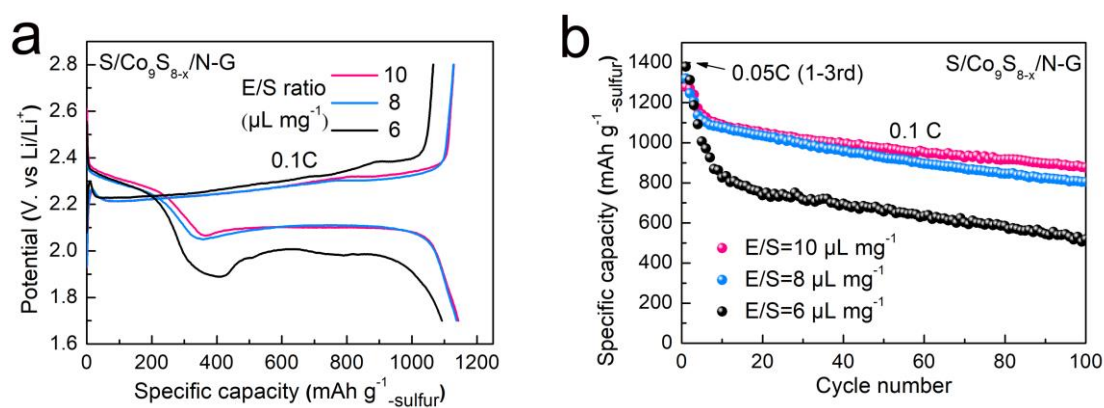

**Figure. S14** a) The initial discharge–charge curve of S/Co<sub>9</sub>S<sub>8-x</sub>/N-doped graphene (areal sulfur loading of 1.5 mg cm<sup>-2</sup>) at 0.1 C rate with various E/S ratios; b) cycling performance with the E/S ratio of 6 μL mg<sup>-1</sup>.

**Table S4** Sulfur loading and area capacity of the reported lithium–sulfur batteries involving metal sulfide as host materials

| Sample                                | Mass loading<br>(mg cm <sup>-2</sup> ) | Area capacity<br>(mAh cm <sup>-2</sup> ) | Reference No. |
|---------------------------------------|----------------------------------------|------------------------------------------|---------------|
| Co <sub>9</sub> S <sub>8-x</sub> /N-G | 14.6                                   | 12.9                                     | This work     |
| Co <sub>9</sub> S <sub>8</sub> -3DGF  | 10.4                                   | 10.9                                     | 1             |
| Co <sub>9</sub> S <sub>8</sub> /C     | 3                                      | 2                                        | 2             |
| Co <sub>9</sub> S <sub>8</sub>        | 4.5                                    | 4.3                                      | 3             |
| N-Co <sub>9</sub> S <sub>8</sub>      | 5                                      | 4.3                                      | 4             |



|                                         |      |      |    |
|-----------------------------------------|------|------|----|
| Co <sub>9</sub> S <sub>8</sub> Nanorods | 3    | 3.15 | 5  |
| CNTs/CoS-NSs                            | 3.8  | 5.05 | 6  |
| NiS                                     | 2.3  | 1.66 | 7  |
| CoS <sub>2</sub> -LBLCN                 | 3    | 4.1  | 8  |
| DCC@MoS <sub>2</sub> /PrNP/CNTs         | 5.2  | 4.75 | 9  |
| C@SnO <sub>2</sub> /MoS <sub>2</sub>    | 5    | 4.55 | 10 |
| MoS <sub>3</sub>                        | 5.5  | 5.16 | 11 |
| Mo <sub>6</sub> S <sub>8</sub>          | 10   | 7.5  | 12 |
| CC@Co <sub>9</sub> S <sub>8</sub>       | 6.1  | 4.35 | 13 |
| MoS <sub>2</sub> -NPs                   | 4    | 3.9  | 14 |
| MoS <sub>2</sub> /rGO                   | 3.6  | 3.3  | 15 |
| rGO-VS <sub>2</sub> /S-89               | 2.56 | 2.6  | 16 |
| TiS <sub>2</sub> @NSC                   | 7.7  | 5.9  | 17 |
| ZnS/ Li <sub>2</sub> S@G                | 3.49 | 3.29 | 18 |

## Reference

1. J. He, Y. Chen and A. Manthiram, *iScience*, 2018, **4**, 36-43.
2. T. Chen, L. Ma, B. Cheng, R. Chen, Y. Hu, G. Zhu, Y. Wang, J. Liang, Z. Tie, J. Liu and Z. Jin, *Nano Energy*, 2017, **38**, 239-248.
3. Q. Pang, D. Kundu and L. F. Nazar, *Mater. Horizations*, 2016, **3**, 130-136.
4. Y. Liu, S. Ma, L. Liu, J. Koch, M. Rosebrock, T. Li, F. Bettels, T. He, H. Pfnür, N. C. Bigall, A. Feldhoff, F. Ding and L. Zhang, *Adv. Funct. Mater.*, 2020, **30**, 2002462.
5. F. Wang, J. Qian, Y. Li, K. Yu, L. Li, F. Wu and R. Chen, *ACS Appl. Mater. Interfaces*, 2020, **12**, 21701-21708.
6. L. Ma, W. Zhang, L. Wang, Y. Hu, G. Zhu, Y. Wang, R. Chen, T. Chen, Z. Tie, J. Liu and Z. Jin, *ACS Nano*, 2018, **12**, 4868-4876.
7. C. Ye, L. Zhang, C. Guo, D. Li, A. Vasileff, H. Wang and S. Z. Qiao, *Adv. Funct. Mater.*, 2017, **27**, 1702524.
8. W. Li, J. Qian, T. Zhao, Y. Ye, Y. Xing, Y. Huang, L. Wei, N. Zhang, N. Chen, L. Li, F. Wu and R. Chen, *Adv. Sci.*, 2019, **6**, 1802362.
9. M. Chen, W. Xu, S. Jamil, S. Jiang, C. Huang, X. Wang, Y. Wang, H. Shu, K. Xiang and P. Zeng, *Small*, 2018, **14**, e1803134.
10. M. Wang, L. Fan, D. Tian, X. Wu, Y. Qiu, C. Zhao, B. Guan, Y. Wang, N. Zhang and K. Sun, *ACS Energy Lett.*, 2018, **3**, 1627-1633.
11. J. Yu, J. Xiao, A. Li, Z. Yang, L. Zeng, Q. Zhang, Y. Zhu and L. Guo, *Angew. Chem. Int. Ed.*, 2020, **59**, 13071-13078.
12. W. Xue, Z. Shi, L. Suo, C. Wang, Z. Wang, H. Wang, K. P. So, A. Maurano, D. Yu, Y. Chen, L. Qie, Z. Zhu, G. Xu, J. Kong and J. Li, *Nat. Energy*, 2019, **4**, 374-382.
13. H. Zhang, Z. Zhao, Y.-N. Hou, Y. Tang, J. Liang, X. Liu, Z. Zhang, X. Wang and J. Qiu, *J. Mater. Chem. A*, 2019, **7**, 9230-9240.
14. P. Han, S. H. Chung and A. Manthiram, *ACS Appl. Mater. Interfaces*, 2018, **10**, 23122-23130.
15. Y. Wei, Z. Kong, Y. Pan, Y. Cao, D. Long, J. Wang, W. Qiao and L. Ling, *J. Mater. Chem. A*, 2018, **6**, 5899-5909.

16. Z. Cheng, Z. Xiao, H. Pan, S. Wang and R. Wang, *Adv. Energy Mater.*, 2018, **8**, 1702337.
17. X. Huang, J. Tang, B. Luo, R. Knibbe, T. Lin, H. Hu, M. Rana, Y. Hu, X. Zhu, Q. Gu, D. Wang and L. Wang, *Adv. Energy Mater.*, 2019, **9**, 1901872.
18. W. Shin, J. Lu and X. Ji, *Carbon Energy*, 2019, **1**, 165-172.
